# Supplementary material for: Gdnf Acts as a Germ Cell-Derived Growth Factor and Regulates the Zebrafish Germ Stem Cell Niche in Autocrine- and Paracrine-Dependent Manners
Source: MDPI journal article supplement (doi:10.3390/cells11081295), 2022-04-11
Supplement: s1 [file s1]

## Supplemental material

### 1. Material and Methods

#### 1.1 *gdnfa* expression in zebrafish adult testis

For *in situ* hybridization, a zebrafish *gdnfa*-specific PCR product was generated with primers *gdnfa-ish-Fw* and *gdnfa-ish-Rv* (Table 1). The ~160 bp PCR product was gel purified, and served as a template for digoxigenin (DIG)-labelled cRNA probe synthesis using the RNA labeling (Roche) kit. Gonads were fixed in 4% paraformaldehyde (PFA) in PBS at 4°C for 2 hours. The protocol used for whole mount (WISH) and *in situ* hybridization (paraffin embedded) were performed with adaptations, as described previously [1]. Detection of hybridization signal was done with HNPP Fluorescent Detection Set (Roche). Nuclei counter-staining was performed with DAPI (Sigma) (1:10000) diluted in PBS (Phosphate Buffered Saline pH 7.4, sterile-filtered).

### 2. Results

#### 2.1 Morphological characteristics and *in situ* hybridization for *gdnfa* in adult zebrafish testis

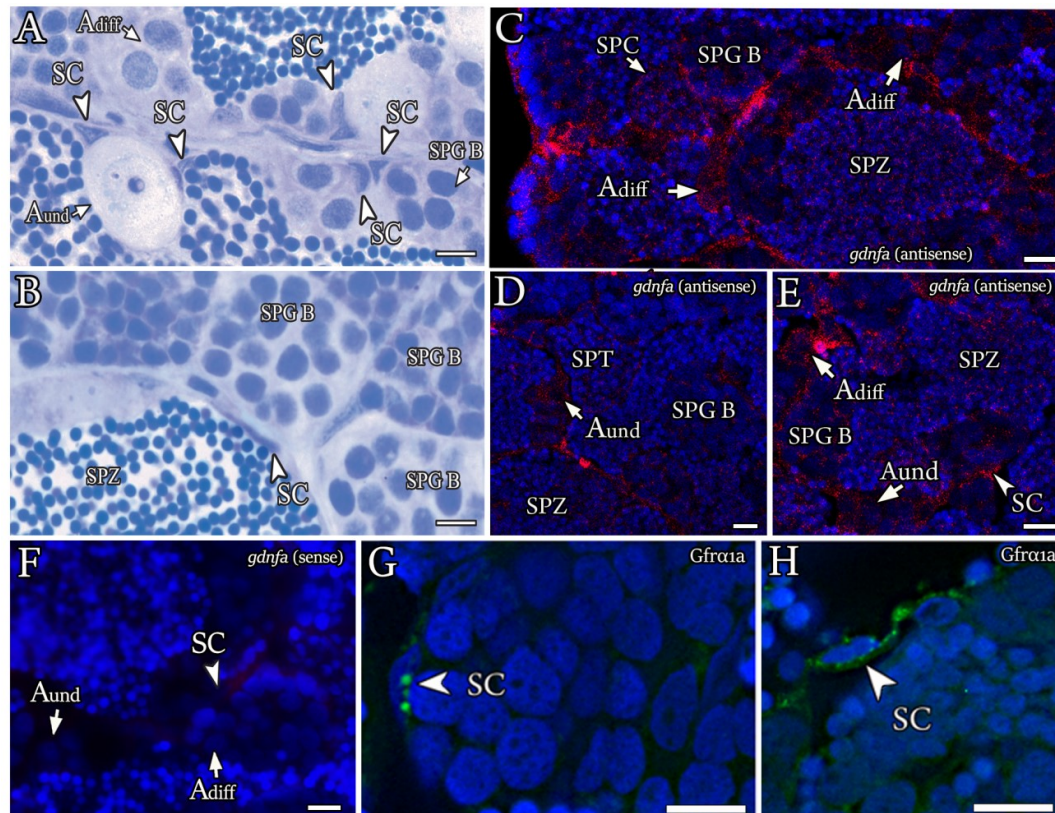

**Supplemental Figure S1.** Morphological characteristics and *in situ* hybridization for *gdnfa* in adult zebrafish testis. A-B. Adult zebrafish testis section showing different germ cysts (arrow) and Sertoli cells (arrowhead). Scale bars: 5  $\mu$ m. C-E. Detection of *gdnfa* mRNA by *in situ* hybridization. Scale bars: 10  $\mu$ m. F. *in situ* hybridization using sense (T3) RNA probe. No staining or very weak staining reveals specificity of RNA-antisense probe. Scale bar: 10  $\mu$ m. G-H. Immunofluorescence for Gfra1a protein (green) in zebrafish testis. Higher magnification showing Gfra1a-immunostaining in Sertoli cells (SC). Scale bars: 10  $\mu$ m. Aund – type A undifferentiated spermatogonia, Adiff type A differentiated spermatogonia, SPG B – type B spermatogonia, SPC – spermatocytes, SPT – spermatids, SPZ – spermatozoa and SC - Sertoli cell.

**2.2 Control sections using either preadsorbed antibody with the corresponding peptide or omitting the antibody**

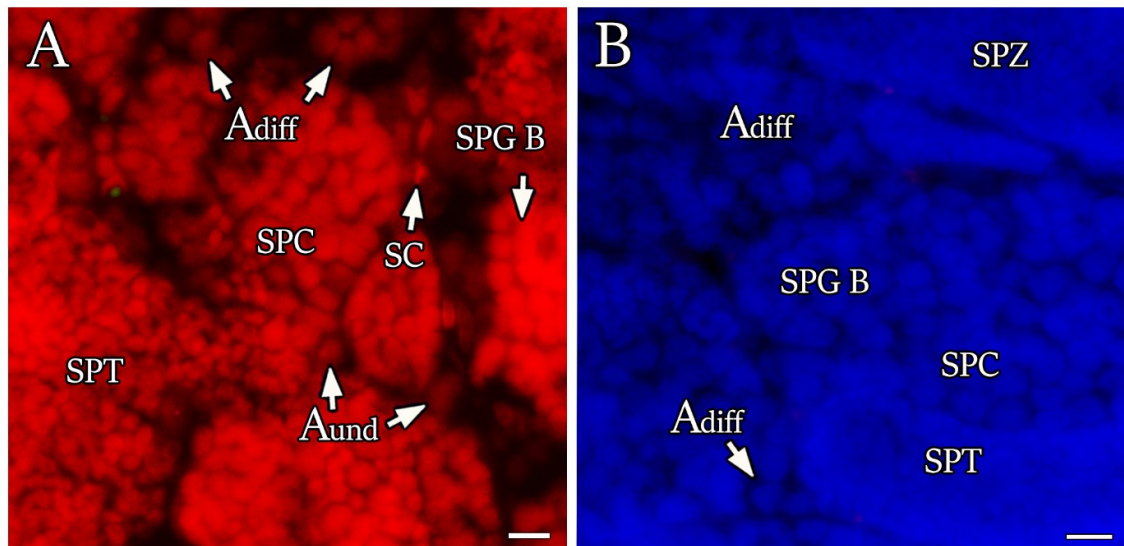

**Supplemental Figure S2.** Control sections of immunofluorescence of cellular localization of Gfra1a protein in zebrafish testis (green - A; red - B) using either preadsorbed antibody with the corresponding peptide or omitting the antibody confirming the antibody specificity. Bars - 10  $\mu$ m. Aund – type A undifferentiated spermatogonia, Adiff type A differentiated spermatogonia, SPG B – type B spermatogonia, SPC – spermatocytes, SPT – spermatids, SPZ – spermatozoa and SC - Sertoli cell.

### 2.3 Detailed interaction between rhGDNF and the zebrafish receptor Gfra1a

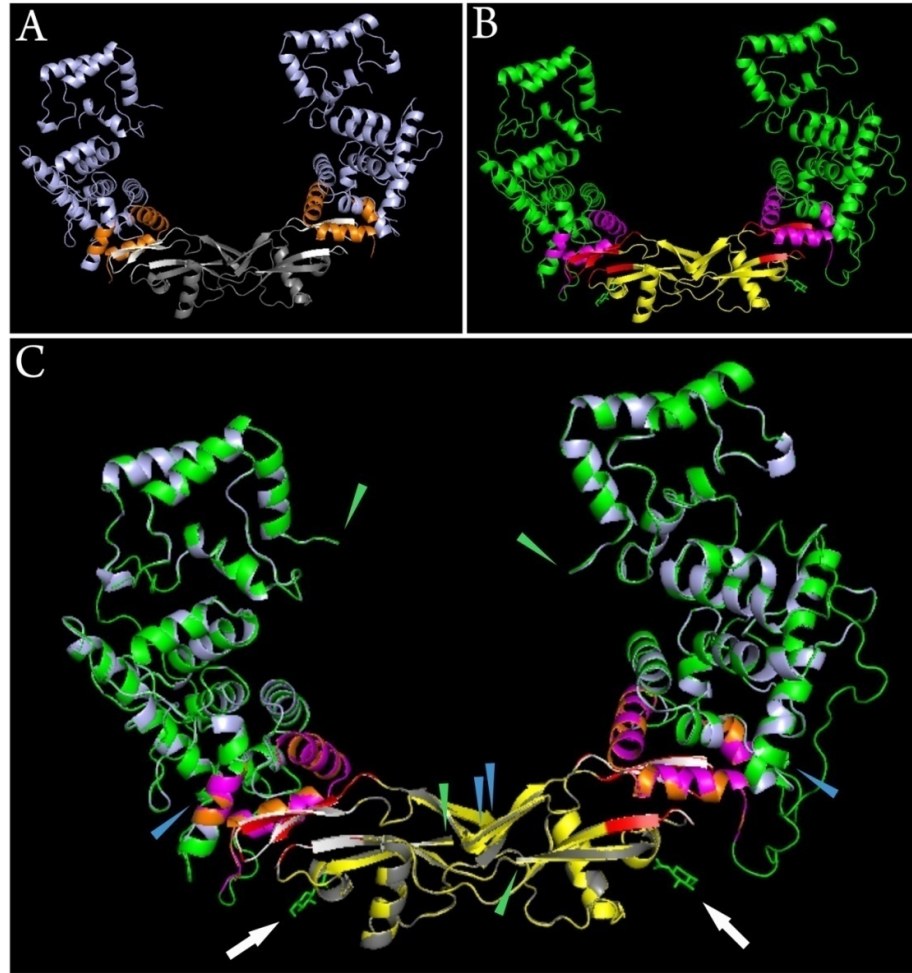

**Supplemental Figure S3.** Predicted protein complex models of *Danio rerio* Gfra1 and rhGDNF (hetero-2-2-mer). In A, the template is chosen according to results performed by SWISS-MODEL ([swissmodel.expasy.org](http://swissmodel.expasy.org)). Blue arrowheads show the Gfra1 protein structure and in orange the ligand sites bind to rhGDNF protein. Dark grey represents the rhGDNF proteins and light grey the ligand sites bind to Gfra1. In B, the 3D model of the Gfra1-Gndf protein structure. In green, the Gfra1 protein structure and in purple the ligand sites bind to Gndf protein. Yellow represents the rhGDNF proteins and in red the ligand sites that bind to Gfra1a. Arrows indicating two ligands of N-Acetyl-D-glucosamine. In C, we merged the template and the model of the hetero-2-2-mer showing the similarity of the structures and the identity of the structure formed at the binding sites between Gfra1 and rhGDNF proteins (orange-purple and light grey-red). Arrows indicating two ligands of the ligand N-Acetyl-D-Glucosamine.

**Video 1 here.**

**Video 1.** Video of the detailed interaction between the rhGDNF and its possible ortholog receptor in zebrafish adult testis, Gfr $\alpha$ 1a. Despite the evolutionary distance between both receptor and ligand, the ligand is still able to respond to the recombinante human GDNF.

| <b>Bayesiana (Beast v1.7.0)</b> |                       |
|---------------------------------|-----------------------|
| Substitution model              | JTT                   |
| Base frequencies                | estimated             |
| Starting tree                   | Randomly generated    |
| Generetations/Burn-in           | 10 000 000/10 000     |
| Sample frequency                | 1000                  |
| Branch support                  | Posterior probability |

**Table S1.** Parameters set to reconstruct the phylogeny.

| <b>Reference (<i>Homo sapiens</i>)</b> | <b>Predicted sequence</b> | <b>Position related +1</b> |
|----------------------------------------|---------------------------|----------------------------|
| TATA-box                               | TATAAA                    | -33                        |
| CRE1                                   | CCTCTGACTTCAGCC           | -161                       |
| CRE2                                   | GTTTAGGTCAGA              | -93                        |
| CRE3                                   | GGGCACGTCACGCA            | -57                        |
| E-box                                  | CATCTG                    | -388                       |
| E-box                                  | CAAGTG                    | -1294                      |
| E-box                                  | CAGTTG                    | -1694 and -1709            |
| E-box                                  | CACGTG                    | -1277; -1461 and -1853     |
| NF-kB                                  | GGAGATTCC                 | -1445                      |
| <b>Reference (<i>Mus musculus</i>)</b> | <b>Predicted sequence</b> | <b>Position related +1</b> |
| TATA-box                               | TATAAA                    | -33                        |
| CRE1                                   | CCTCTGACTTCAGCC           | -161                       |
| CRE2                                   | GTTTAGGTCAGA              | -93                        |
| CRE3                                   | GGGCACGTCACGCA            | -57                        |
| E-box                                  | CAACTG                    | -805 and -1394             |
| E-box                                  | CAGATG                    | -1587 and -1865            |
| E-box                                  | CAGTTG                    | -1690                      |

|                                       |                             |                            |
|---------------------------------------|-----------------------------|----------------------------|
| N-box                                 | CACCTG                      | -1373; -1451 and -1843     |
| N-box                                 | CACCAG                      | -1660                      |
| AR                                    | TCTTCCAGAACACATACTCCCCAACAA | -829                       |
| NF-kB                                 | GGAGATTCCG                  | -1435                      |
| NF-kB                                 | AGTGGCCTT                   | -1480                      |
| <b>Reference (<i>Danio rerio</i>)</b> | <b>Predicted sequence</b>   | <b>Position related +1</b> |
| TATA-box                              | TTAAAAAGCGC                 | -28                        |
| GC-box                                | GGGCGG                      | -75                        |
| CRE canonical                         | TGACGTCA                    | -59                        |
| E-box                                 | CAGTTG                      | -350                       |
| E-box                                 | CAACTG                      | -705; -1411 and -1777      |
| N-box                                 | CACCAG                      | -1696                      |
| AR – half site                        | AGAACA                      | -1027 and -1805            |

**Table S2.** Predicted regulatory binding sites of the GDNF promoter in *Homo sapiens*, *Mus musculus* and *Danio rerio*.

### 3. Reference

1. Thisse, C.; Thisse, B. High-resolution in situ hybridization to whole-mount zebrafish embryos. *Nat Protoc.* **2008**, 3, 59-69.
